# Muller's ratchet as a mechanism of frailty and multimorbidity

Diddahally R. Govindaraju<sup>a,b,1, 2</sup>, and Hideki Innan<sup>c,1,2</sup>

<sup>a</sup>Department of Human Evolutionary Biology, Harvard University, Cambridge, MA 02138;  
 and <sup>b</sup>The Institute of Aging Research, Albert Einstein College of Medicine, Bronx,  
 NY 1046, and <sup>c</sup>Graduate University for Advanced Studies, Hayama, Kanagawa,  
 240-0193, Japan

Authors contributions: D.R.G., H.I designed study, performed research, contributed new  
 analytical tools, analyzed data and wrote the paper

The authors declare no conflict of interest

<sup>1</sup>D.R.G., and H.I. contributed equally to this work and listed alphabetically

<sup>2</sup> Correspondence: Email: [dgovindaraju@fas.harvard.edu](mailto:dgovindaraju@fas.harvard.edu); [innan\\_hideki@soken.ac.jp](mailto:innan_hideki@soken.ac.jp)

Senescence | mutation accumulation | asexual reproduction | somatic cell-lineages|  
 organs and organ systems |Muller's ratchet | fitness decay| frailty and multimorbidity

Mutation accumulation has been proposed as a cause of senescence. In this process, both constitutional and recurrent mutations accumulate gradually and differentially among differentiating cells, tissues and organs, in relation to stage and age, analogous to Muller's ratchet in asexually reproducing organisms. Latent and cascading deleterious effects of mutations might initiate steady "accumulation of deficits" in cells, leading to cellular senescence, and functional decline of tissues and organs, and ultimately manifest as frailties and disease. We investigated a few of these aspects in cell populations through modeling and simulation using the Moran birth-death process, under varied scenarios of mutation accumulation. Our results agree with the principle of Muller's ratchet. The ratchet speed in a given tissue depends on the population size of cells, mutation rate, and selection coefficient. Additionally, deleterious mutations seem to rapidly accumulate particularly early in the life-course, during which the rate of cell division is high, thereby exerting a greater effect on cellular senescence. The speed of the ratchet afterward varies greatly between cells nested in tissues and tissues within organs due to heterogeneity in the life span and turnover rate of specific cell types. Importantly, the ratchet accelerates with age, resulting in a synergistic fitness decay in cell populations. We extend Fisher's average excess concept and rank order scale to interpret differential phenotypic effects of mutation load in a given tissue. We conclude that classical evolutionary genetic models could explain partially, the origins of frailty, subclinical conditions, morbidity and health consequences of senescence.

## Significance

Frailty is defined as physiological and functional decline of organs and organ systems, due to deficit accumulation from stochastic damages within the organism with advanced age. Equivalently, with age, both constitutional and somatic mutations accumulate gradually and differentially among cells, cell lineages, tissues, and organs. Since most mutations are deleterious, accumulation of random and recurrent mutations could create a “load,” on the genome and contextually express in the epigenome and phenotype spaces. Here we extend Muller’s ratchet principle to explain frailty and multi-morbidity using the Moran model and simulations. Our results agree with the Muller’s ratchet principle. We emphasize the need for considering cumulative effects of the entire spectrum of mutations for explaining the origin of frailty, sub-clinical conditions, and morbidity.

“Different organs of the body have their individual liabilities, as also same organ in different individuals ...idiosyncrasy whether of individual subjects or of individual organs, is an important factor...” (1).

“If one organ or group, for any accidental reason begins to function abnormally and finally breaks down, the balance of the whole is upset and death eventually follows” (2).

**Senescence** is a time-dependent biological process involving irreversible arrest of cell proliferation, altered metabolic activity, functional deterioration of tissues, organs and organ systems of individuals and populations (3, 4). From a developmental genetics viewpoint, senescence or the biological aging process may be initiated shortly after the formation of the zygote (i.e., at the first mitotic division) and progress at variable pace into older ages, culminating in death (5–8). Organisms are the ultimate products of integrated hierarchical organization and development as well as mutually influencing modular systems ranging from molecules to organs and organ system (9, 10). Accordingly, the deteriorative processes associated with senescence could arise at any of these levels and potentially influence only a few or all levels of ontological hierarchies: cells, organs, organ systems and individuals at different rates (8, 11, 12). Ultimately, the cumulative effect of such deteriorative processes may lead to a functional decline of the correlated and interacting components of the biological system as well as affect viability (longevity) and reproduction of individuals – collectively, the Darwinian fitness.

**Senescence as an intrinsic property of developmental process:** In brief, developmental processes are initiated by the fusion of male and female haploid gametes to form a unicellular and omnipotent diploid cell - the zygote. Following a series of mitotic divisions, zygote differentiates into three layers of pluripotent stem cells- endoderm, mesoderm, and ectoderm (13). Stem cells in these layers further undergo a succession of divisions, transformations and differentiation and get assorted spatially into quasi-independent, specialized, yet integrated hierarchical modules of tissues, organs and organ systems within the organism (14, 15) (**Figure 1**). As modular traits, they show ontogenetic and functional integration and interaction as well

as influence each other across all levels of the genotype – epigenetic – phenotype (G-E-P) space (9, 10, 16–18). Fully differentiated and developed organs and organisms not only exhibit individual variation for specific metric traits, but each of these traits also generally follow a Gaussian distribution at population levels, a feature typical to quantitative traits. For instance, measures of kidney, heart, liver, brain, and lungs vary among individuals (19, 20). Thus, the individual may be viewed as spatially organized and interacting system of polygenic traits/organs. Clearly, each of these traits, and their components are subjected to age related changes, just as organisms do. Hence, senescence as an intrinsic aspect of developmental process would influence the G-E-P spaces of all organs, organs systems and ultimately, the individual.

**Features of frailty:** In the life course of individuals (i.e., from fertilization to death) and populations, senescence is primarily restricted to post reproductive stages, during which, senescent cells accumulate in multiple tissues and organs leading to vulnerability and pathogenesis of many diseases of somatic origin (21). Consequently, post-reproductive individuals start showing both physiological and functional decline, collectively termed frailty. From a gerontological perspective, frailty is a stochastic and dynamic process of deficit accumulation which occur ubiquitously at subcellular levels, ultimately affecting tissues, organs, and integrated organ systems, especially under stress. Although some individuals have greater propensity to accumulate deficits, on average, deficit accumulation varies across the life course and likely is mutable. (22). Since, cells are the primary sites of deficit accumulation, cellular frailty is a major cause of declining physiological and physical functions of organs (“organ deterioration”(23), resulting in single or co-occurrence of several late-onset diseases (multiple morbidity). Together, these processes contribute to reduced survival ability of such phenotypes (24–26). Thus, senescence, frailty and morbidities may share common origins (27).

**Mutations as catalysts of senescence:** Among the many theories posited to explain the aging process or senescence, accumulation and amplification of inherited (constitutional) and acquired mutations in somatic and reproductive tissues are widely recognized as a cause of aging [mutation accumulation theory (MA) (28, 29)– (Medawar 1952; Szilard 1959). In a similar

vein, Muller (30) suggested that adverse effects of numerous mutations in the genome, may cumulatively create a “load” (mutational load – ML) which could become a “burden” on the health of individuals in populations. The load is generated by sequential cell division initiated following post-zygotic fissions, which in turn create opportunities for DNA replication errors during strand segregation at every cell division event, some of which are repaired by DNA repair mechanisms. Nonetheless, the “burden” of somatic mutations also increases linearly with age. Although the burden of mutational load “could be measured only abstractly in terms of fitness, but ... felt in terms of death, sterility, illness, pain and frustration” (31). Indeed, a few of these factors mediate both frailty and morbidity. Subtle differences aside, both MA and ML theories address the same issue; i.e., adverse effects of mutations on somatic and reproductive tissues, and ultimately, overall health.

The MA process is a gradual and ubiquitous feature among all differentiating cell lineages within tissues and organs, and organ systems within the organism – a process comparable to asexually or clonally reproducing organisms. In fact, “the dividing zygote is a clone. Just like a clone of unicellular organisms, embryonic cell divisions pass on any genetic variation which arises in previous divisions” (14). Each additional mutation may have cumulative and multiplicative adverse or advantageous effects on the organism at various levels: genomic instability, molecular heterogeneity, loss of cell-division, altered gene expression, impaired inter-cellular communication, tissue disintegration, organ dysfunction and vulnerability to stresses and all of which may synergistically influence both fitness and healthspan (32–37).

**Mutation accumulation in somatic tissues as a ratchet:** Mutations appear to accumulate at a rate of 1-2 per division during early embryogenesis, and a cascade of additional mutations would be accrued in subsequent embryonic lineages (38) and ultimately develop into a complex organism. Consider the fact that an adult human is composed of 37 trillion cells distributed among approximately 80 organs (13, 39), and all of which connect back to once cell – the zygote. Correspondingly, differentiation and development of the zygote over decades would create ample opportunities for billions of mutations to accumulate virtually in every tissue and

organs, despite DNA repair mechanisms. Like asexually propagated organisms, various classes of mutations [lethal, semi-lethal, nearly neutral mutations - (40, 41)], with wide-ranging and largely irreversible allelic effects gradually accumulate virtually among all somatic cells, cell lineages and tissues (42) in a stepwise ratchet-like manner (Figure 1, 2), also known as Muller's ratchet (43). Although, in principle, human cell lineages cannot readily produce a new organism, "inheritance and replication of (cells) is not by no means precluded" (14). The ratchet typically involves, "... an instability in the distribution of the numbers of carriers of deleterious mutations genomic instability when there is no recombination, brought about by genetic drift in a finite population" (44). Clearly, the drift of a finite number of cell population containing unstable genomes, among dividing population of cells within tissues and organs (comparable to chimeras) could lead to their diminished or complete physiological dysfunction/shut down, affecting the viability fitness of cells and their lineages – a process analogous to meltdown or extinction (45). Harmful effects of mutation accumulation might be amplified further under stressful conditions (46) such as internal and external environmental insults. The inter-cellular spaces left by dysfunction and death of cells, may remain unoccupied by newer cells or may be filled with toxic cellular waste products. Together, these processes could potentially reduce intercellular integrity and robustness of the cell and tissue architecture and interfere nutrient signaling and distribution, initiating senescence (47, 48). At this stage, cells could enter into an irreversible physiological state, and can no longer divide. Senescent cells, on the other hand, also secrete various proteins such as inflammatory cytokines and growth factors, which could stimulate the resident stem cells to repopulate and remodel the tissue (25). Thus, senescence could be both a destructive and a constructive process. In older tissues, however, it is largely a degenerative process.

From a genotype-epigenetic – phenotype map (17, 18) perspective, it is reasonable to suggest that lifelong, cumulative and differential effects of the accumulation of 'deficits' at the genetic, epigenetic and cellular phenotypic levels affect the physiological and genetic homeostatic properties of cellular phenotype and ultimately the aging phenotype and phenotypic components (49–51), accordingly. Upon superimposing the concept of frailty onto

the principle of Muller's ratchet we postulate that relative frailty of phenotypes [(i.e., cell(s)), tissue and multimorbidity of organs within individuals) may be a function of the load of mutations they carry. Under nearly neutral theory, both synonymous and non-synonymous mutations impart a different degrees of deleterious effects (in the absence of advantageous back mutations) on the phenotype (34, 52). Then, in a demographic sense, the degree of frailty of tissues, and organs may reflect a range of susceptibilities to mutational burden they carry (30, 43) in relation to stage and age of tissues. Ultimately, organ failure may represent a functional collapse at a "tipping point" (24) leading to physiological and dysfunction of tissues - simply, "mutation meltdown" (45).

It has been suggested that understanding possible genetic and molecular mechanisms of the frailty process will be instrumental in order to develop preventive and palliate measures to counter certain aspects of morbidity (53) in multiple medical specialties (54). Clearly, ideas from evolutionary genetics could be extended to gain insights on some of the enduring questions in aging and human health. Indeed, "Some patterns in metazoan developmental processes may be approached by quite standard neo-Darwinian cognitive styles." (14). To our knowledge, a comprehensive study of evolutionary genetic bases of the relationship among cellular senescence, frailty and multimorbidity has not received much attention. We have two objectives in this study: a) to apply Muller's ratchet principle to aging process in somatic tissues, and b) to discuss the utility of evolutionary genetic mechanisms toward understanding the origins of frailty, morbidity and senescence. We make the following assumptions: 1) cell is the primary unit of differentiation, development, and regeneration and also represents correct abstraction of the individual (55, 56); 2) All organs and mosaics within an individual are derived from the same zygote (cell), yet they are differentiated, connected, function autonomously, and might be exposed to the same or different environmental conditions; and 3) cellular senescence (57) is both a norm and a precursor to other known degenerative processes in tissues, organs and ultimately the organism; but could also influence regeneration and tissue remodeling (25, 47). Among numerous theories advanced to explain the aging process (58), we focus only on Muller's ratchet as a possible cause of frailty, vulnerabilities to diseases, and morbidity in the course of human growth and development.



## Model

Our model takes a demographic approach to aging process starting from a single stem cell through differentiation and development into mature tissues and organs, analogous to embryogenesis and its clonal lineages (14), as well as their gradual loss of physiological functions over time, and eventual death (Figure 1). It assumes that each cell is specified by three parameters, the rate of cell division, functionality or healthiness and death rate (respectively, denoted by  $b$ ,  $f$ , and  $d$ ), which are given by a function of the mutations that the cell has accumulated. Basically, by assuming all mutations exert deleterious effects on cell populations to varying degrees (40, 41),  $f$  and  $b$  decrease and  $d$  increases as a cell accumulates mutations.  $f_0$ ,  $b_0$ , and  $d_0$  represent their values at birth, and their changes by a mutation is given by  $\delta f$ ,  $\delta b$  and  $\delta d$  (see Suppl. for details).  $F(t)$ ,  $B(t)$  and  $D(t)$  are the sums of  $f$ ,  $b$  and  $d$ , respectively, over all cells in the population at time  $t$ .

As illustrated in Figure 2, any tissue is a population of cells, in which each of the constituent cells are genetically variable (hence different genotypes) and some are more variable than others. The population proliferate from a single cell, and the cell population size at time  $t$  is denoted by  $N(t)$ , and  $t$  represents age and  $t$  starts at  $t = -1$  (roughly corresponding to the time of fertilization and zygote formation).  $N(t)$  is assumed to increase up to  $K$ , which represents the population size of an adult. Then, as aging proceeds,  $N(t)$  could start declining. This assumes well-known phases of density dependent population growth (lag, stationary, decline), as well as exhibit the salient features typical to such populations - connectivity, cooperation, competition and coevolution (59, 60). Thus, the process may be divided into three phases (Figure 2B). The first phase (Phase I - lag) is from the initial state to  $T_1$ , after which  $N(t) = K$  (Phase II - stationary).  $T_2$  is the time when  $N(t)$  starts declining, and this phase is referred to as Phase III.

In this work, we modified the Moran model such that we can incorporate the change of population size as illustrated in Figure 2B. In brief, we introduce a parameter  $U(t)$ , an upper limit of the population size (e.g., all healthy tissues and organs have a species specific size limit). The population can increase up to  $U(t)$  if  $B(t) > D(t)$ , but the population will decrease in size if

$B(t) < D(t)$ . When the tissue is young and healthy enough ( $B(t) > D(t)$ ), the population size is kept at  $U$ , but as all cells in a tissue accumulate deleterious mutations and  $D$  becomes greater than  $B$ , the population size starts declining. See supplementary part for theoretical details.

## Results

Our model incorporating demographic changes provides a simulation framework for exploring the aging process in growing cell populations. In addition, some analytical expressions on the nature of mutation accumulation during aging process may be obtained with simple and biologically justifiable assumptions. We first describe the theoretical results to gain insights into the mutation accumulation process through aging process or cellular senescence (4), followed by more detailed analyses by simulations.

*Theory:* Let us first focus on Phase I, in which  $B(t)/D(t) \gg 1$  and  $D(t)$  is so small that most events are cell divisions due to an increase of  $U(t)$  and  $N(t)$ . We then derive approximate expressions for the number of somatic ( $S$ ) mutations,  $S_{ave}(t)$  and  $S_{total}(t)$ , the average and total numbers of mutations that cells have accumulated by time  $t$  (i.e.,  $S_{total}(t) = S_{ave}(t)N(t)$ ). Consider a situation where there are  $N$  cells waiting for an increase of  $N$  to  $N+1$  by division. If a cell having  $s$  mutations (constituent) undergoes a cell division, its two daughter cells will have  $s$  mutations plus new mutations that occur at rate  $\alpha\mu$  in one cell and at a rate  $(1-\alpha)\mu$  in the other. Therefore, when  $N$  increases by one through a single cell division event, the expected increase of  $S_{total}(t)$  is  $S_{total}(t)/N(t) + \mu$ . Thus,  $S$  increases as  $N$  increases, and if we ignore death events,  $S_{total}(t)$  roughly satisfies

$$\frac{dS_{total}(t)}{dN} = \frac{S_{total}}{N} + \mu \quad (1)$$

with a continuous approximation for a large  $N$ , from which we have

$$S_{total}(t) = \mu N(t) \log N(t). \quad (2)$$

$S_{total}(t)$  is thus given by a function of  $t$  if  $N(t)$  (or  $U(t)$ ) is specified (e.g., see equation (S1 in supplementary information).

If cell death (apoptosis and necroptosis) is taken into account, we consider two paths from  $N$  to  $N+1$  by assuming the time interval ( $\Delta t$ ) from  $N$  to  $N+1$  is so small (i.e. time taken for

one cell division) that at most one cell death occurs in  $\Delta t$ . The first path is that a single cell division increases  $N$  to  $N+1$ , as described above. The second path involves a cell death, and the dead cell is eliminated by intercellular competition, which changes  $N$  to  $N-1$ . Then, two cell divisions follow and the population size becomes  $N+1$ , according to the assumption of a very small  $\Delta t$  (so that multiple death events are not considered). Let  $p$  be the probability that the system goes through the second path. Because the expected increase of mutations is  $S_{total}(t)/N+2\mu$  in the second path, Equation (5) may be written as

$$\frac{dS_{total}}{dN} = \frac{S_{total}}{N} + (1-p)\mu + 2p\mu = \frac{S_{total}}{N} + (1+p)\mu \quad (3)$$

where,  $p=D(t)\Delta t$ .  $\Delta t$  depends on the growth function,  $U(t)$ .

The process of mutation accumulation in phase II is quite simple because a death event is always coupled with a cell division. That is, the accumulation of mutations simply depends of the death rate,  $D(t)$ :

$$\frac{dS_{total}}{dt} = \mu D(t) \quad (4)$$

This process is analogous to mutation accumulation in constant-size asexual populations also called, Muller's ratchet, which reduces fitness (61).

In Phase III, a dead cell may not be filled by a new cell, which may have a cascading effect on the integrity of cell populations: formation of intercellular spaces, disintegration and interference with their adhesion, connections and communications (62) as well as deceleration of the repair process. Let this probability be  $q=B(t)/D(t)$ . Because such an event simply decreases a cell,

$$\frac{dS_{total}}{dt} = (1-q)\mu D - q \frac{S_{total}(t)}{N(t)} \quad (5)$$

It is quite straightforward to compute  $S_{ave}(t)$  from equations (1-5) if the effect of mutations on  $b$ ,  $d$ , and  $f$  is ignored (i.e., mutations are neutral). Under this setting, cells do not degrade such that Phase III does not arise. With this assumption, Figure 3 demonstrates that the prediction of equations (1-5) is in excellent agreement with simulation results detailed below, indicating our theory well describes the accumulation of mutations in Phases I and II.

Simulations were performed by assuming a logistic growth of the population size up to  $K=100$  with the initial growth rate  $r=0.5$  [(equation (S1) in supplementary information)]. We assumed  $b=0.5$ , and five values of  $d$  were considered ( $d=0, 0.01, 0.02, 0.05, 0.1$ , from bottom to top in Figure 3). In all five cases, the number of mutations,  $S_{ave}(t)$  dramatically increases in Phase I. In Phase II,  $S_{ave}(t)$  linearly increases and the speed of ratchet depends on the death rate;  $S_{ave}(t)$  increases faster for a larger  $d$ . This is simply because a cell death is always followed by a cell division, through which mutations are introduced (47). Therefore, a large  $d$  implies a fast turnover of cells, resulting in a fast accumulation of mutations. Our theoretical result for Phases I and II indicates that, (i) when the tissue grows to maximum (adult) size, a large number of cell divisions occur and mutations accumulate very rapidly, potentially damaging the functionality or healthiness of the tissue. (ii) The rate of mutation accumulation totally depends on the rate of turnover (death rate) when the tissue sizes reach the adult size. Therefore, for tissues like brain where the number of cells are almost fixed (relative to other organs such as liver, musculoskeletal system) and little or no cell division occurs in Phases II and III, mutations in very early stages in Phase I plays a crucial role, particularly in the aging of the brain. This result is consistent with a recent finding that most somatic mutations in brain originate first several rounds of cell divisions. In contrast, tissues with a high rate of cell renewal (e.g., skin, blood, small intestine – see above), the relative contribution of mutations at such very early stages in Phase I is generally small because the tissue continues to accumulate mutations throughout the lifespan of individuals.

*Simulation:* The above theory is based on the simplified assumption that mutations do not affect  $b$ ,  $d$ , or  $f$ , therefore it is applicable when the tissue is healthy (homeostatic state) enough to maintain the cell (approximately constant) population size (i.e.,  $B>D$ ). In order to explore the entire aging process, we performed simulations under a more realistic situation, where the effect of mutations on  $b$ ,  $d$  and  $f$  is involved. With this effect,  $f$  and  $b$  decrease but  $d$  increases along with the accumulation of mutations as we defined in equations (1-5). As a consequence,  $D$  eventually becomes larger than  $B$ , and from this time point, the phase can shift from Phase II to Phase III. Because it is not very straightforward to evaluate  $S_{ave}(t)$  with the above equations, we performed a number of runs of simulations. As well as Figure 2,  $r=0.5$  and

*K*=100 were assumed. For convenience, it is assumed that a deleterious mutation affects *f*, *b* and *d* equally, that is,  $\delta f = \delta b = \delta d = \delta = 0.05$ . *b*<sub>0</sub>=0.1 was assumed and we changed *d*<sub>0</sub> to vary the speed of aging.

The consensus we found in a number of simulation runs is that the tissue degrades gradually over time, as expected for frailty, and that it will eventually reach physiologically dysfunctional state [(meltdown, sensu (45))] both by the shrinking population size of healthy cells and with the death of apoptotic and necroptotic cells. In our model, incipient meltdown could begin when the existing cells do not have ability to fill all empty slots, that is, when *D*(*t*) exceeds *B*(*t*) (the point at which the blue and red lines cross in Figure 3). After this time point (Phase III), the population size decreases gradually and irreversibly. In this phase, the aging process accelerates largely because, in addition to the decrease of healthiness of each cell, the healthiness (~fitness) of cell population decreases synergistically together with the decrease of the population size. It is also interesting to note that there is great heterogeneity in fitness (or vulnerability) among cells within the cell population. That is, in principle, cell populations diverge into clusters due to mutation accumulation within a tissue or among tissues nested within an organ, and could be graded in relation to their viability fitness (63). Cell is the driving force for the ratchet to proceed. A low-ranked cell and cell-lineages likely become physiologically dysfunctional and die, and in a healthy tissue (Phases I and II), a daughter cell of a high-ranked cell likely replaces, but cell division of a high-ranked cell (due to high mutational load; see Figure 2) would decrease the fitness of the two daughter cells and their lineages. Such deterioration of the fittest cell signifies a “click” of the ratchet, and the deterioration of cell populations is proportional to number of clicks (64). The situation is even worse in Phase III, where high-ranked cells are too deteriorated to replace low-ranked cells, thereby causing a decrease of the population size (therefore the tissue healthiness dramatically drops; Figure 2).

## Discussion

Physiological and morphological decline with advanced age is universal to all organisms. Some of these deteriorative processes, commonly described as frailty, are apparent at multiple levels of biological organization ranging from sub-cellular to supra-cellular systems: genome,

epigenome, tissues, organs and the organism. Clinical frailty involves a cumulative decline in the developmental, anatomical, physiological and phenotypic functions and numerous human disorders (25). It is attributed to “lifelong accumulation of molecular and cellular damage” (49, 65, 66) which could disrupt genomic and biochemical networks leading to dysfunction of a cell or a tissue, an organ or many. Clearly, although frailty is recognized primarily as a geriatric condition it is an emergent condition and a syndrome affecting multisystems of the human body at various biological levels and stages in the entire lifespan of individuals (67). Damage at the molecular level includes both benign and pathogenic variants among arrays of inherited (constitutional) and somatic (passenger) mutations (68) in the genome. These variants accumulate differently in the genome among the diverging lineages of cell populations in relation to age – a process analogous to mutation accumulation in asexual lineages (69). In fact, cumulative effect of constitutional and passenger mutation could create dosage imbalances and epigenetic drift, which in turn, are known influence organs and organ systems in aging, cancer and other clinical conditions in hereditary diseases (36, 70).

In the present study, we extended the Muller’s ratchet principle on growing and branching population of cells assuming that they live for the entire life course (say 80 - 100 years in humans) in several steps: First, Moran birth-death (demographic) process of cells in finite cell populations (i.e., tissues); second, we introduced mutations into these cells at various stages of development of individual cells and simulated the consequences of these branching clonal lineages of cell populations. Since mutations accumulate differentially both within and among cell populations (71), with time, they become structured. Accordingly, it is reasonable to assume each individual cell population could show different viability fitness, however small it may be. Our results agree with empirical studies dealing with mutation accumulation and trajectories of senescence on model systems as well as human disorders. First, growth, stability and decline of cell populations follow features typical to stable populations with constant age structure. This pattern also agrees with age-dependent gene expression profiles, which often serves as a proximate index of genomic variation (12, 32). Second, as shown in the bottom panel of figure 4, birth (blue line) and death rate (red line) increase or decrease in relation to mutation accumulation. These lines cross around age 50 [(essential lifespan, (37))] after which

the cell populations enter a declining phase (*i.e.*,  $B < D$ ). This trend also corroborates with the Hayflick limit, which suggests that normal healthy cells in culture will divide between 40 and 60 times before reaching a plateau afterward their density declines due to senescence. Third, if cells are dividing abnormally fast (Fig. S1C), they might survive for about 15 years (e.g., Hutchinson-Gilford syndrome). However, it is likely that the health status of various tissues and organs could vary, in relation to relative degrees of mutation accumulation. Interestingly, this is generally the case for progeroid syndromes, in which a causal relationship with gene specific accelerated rate of mutation accumulation and attendant aging syndrome have been established. In these syndromes, mutations accumulate differentially and show pleiotropic effects among tissues and organs affecting many physiological pathways, frailty and ultimately affect their health and longevity(72). Alternatively, our simulation study also showed the possibility for renewal or a capacity for homeostasis, suggesting that while senescent cells die, dead cells may be replaced by new stem cells opening up an opportunity for rejuvenation or remodeling of the tissue. How might these two seemingly opposite phenomena co-occur? Note that when senescent cells are eliminated from a tissue, senescence associated secretory phenotype (SASP) recruits T helper lymphocytes. The SASP remobilizes and repopulates the nearby progenitor cells and eventually remodel the tissue (25). Clearly, under special conditions, senescence is both a degenerative and creative process and help restore damaged tissue (25, 73) and not a consistently unidirectional process. Four, mutations that originate first rounds of cell divisions appear to have greater influence of cellular senescence than the ones that appear late in the lifespan of the tissue or organ. Recent work suggests that mutations that occur prenatally in the brain could amplify later into life into mosaics and cause neurodegeneration (74, 75) Interestingly, mutations rate as measured by single nucleotide variants (SNVs) differed vastly between the mutated cell line ( $10^{-4}$ ) vs.  $10^2 - 10^3$  in normal neighboring cells. This result not only supports the principle of Muller's ratchet, but also the origin of latent and aggressive chronic disorders, as well as shifts in the rate of mutation accumulation in relation to age and stage in the development of the organ. This may also explain about four-fold increase in multimorbidity after 65 years of age (65) relative to younger ages.



As a parsimonious explanation, Muller's ratchet among cell populations, illustrates the possibility that specific cell populations within tissues and organs could accumulate numerically excessive individual mutations regularly and genetically diverge over time. Hence, such an ensemble of cell populations would share similarities with structured biological populations, with the only exception that cell populations may or may not experience the amount or spectrum of environmental stresses that the latter ones do. The collective ensemble of the deleterious influence of all mutations in the genome (not necessarily only the most harmful ones) in genetically distinct somatic cell lineages and populations may also contribute to reduced viability fitness specific to each population. Further, these populations may also display different intrinsic vulnerabilities for degeneration, within a given tissue or organ, due to different levels of genetic variation among them. Many of such early events that occur during the process of mutations load in small cell populations could be common to both senescence and cancer (76). This situation is comparable to Fisher's "average excess" (77) defined as the amount by which the weighted fitness of individuals carrying specific alleles exceeds that of the population as a whole (78). The only difference is that, in our case, we have populations of individual cells, instead of mature individuals in populations. Note that the average excess represents an average of allelic products (proteins/metabolites) a cell or a cell population produces; which could increase or decrease its fitness depending upon the phenotypic effects of mutant alleles carried by each individual (78, 79) (Figure 2). This scenario also hints at the possibility that in some situations, total mutation rate, and not the deleterious effect of individual mutations may influence the average fitness of cell populations as illustrated by the Haldane-Muller principle (80). These spectrum of mutations could potentially induce various degrees of cis-ruption in the spatially organized network of genes and haplotype networks which could progressively retard or even shutdown cellular repair mechanisms (81), and metabolic flux (36). These synergistic and time-lag processes might also exert cascading and disintegrating effects on subtle connections, cooperation or competition among intra – and inter-cellular organization, communication and transport; which may result in the genetic divergence of somatic tissues (82) and subsequently influence the frailty among physiological, anatomical and morphological traits. In fact, while networks confer stability to biological



systems (83), instability could lead to multiple organ dysfunctional syndrome (MODS (67)) . Obviously fitness could change among the divergent population (crypts) of cells, within tissues in relation to number of mutations (31, 83). An excellent example of this process was recently provided by (84)(85), epilepsy (86), cardiovascular and skeletal disorders (21) as well as several brain disorders including cerebral palsies (87) and cortical malformation (88). A comprehensive list of diseases associated with many organs and their component tissues (25) clearly suggests phenotypic manifestation of interaction among developmental disorders and frailty leading to multimorbidity. A more recent study involving more than 3000 families (89) and coworkers have reported that diseases of de novo origin may be more common than previously thought, and could affect nearly four million children worldwide, annually. Similarly, somatic origins of late onset complex disorders such as stroke, demyelination, optic nerve disorders and brain cancers represent only the “tip of the iceberg” (90) of numerous disorders, yet to be described.

There are limitations to our study, however. Since our goal was to extend Muller’s ratchet principle to link cellular senescence and frailty, we modeled these processes, based on average mutation accumulation in populations of brain cells as example. The model could be extended, however, to other tissues assigning tissue specific mutation rates (91), and recruitment cycle of cells, which are often context dependent, as discussed. We have relied on mutation accumulation process in asexual lineages, in which Muller’s ratchet has been suggested to operate. In our model, the growth parameter for cells, “ $U$ ” is greater at the initial stages (phase 1 - childhood), later it becomes fairly stable, but decreases at later ages. These results agree with molecular data (38, 75) as well demographic and evolutionary models of aging (6, 92, 93). For instance, Lodato et. al (75) reported approximately 1000 SNVs by 5 months, but steadily increase after 40, and exponentially so after 80. They call the plateau “quiescent phase.” Note, the quiescent phase envelops region of maximum Darwinian fitness (6). Additionally, it is important to experimentally determine fitness differentials among cell lineages within tissues in relation to mutation accumulation (83).

Another limitation is that we considered a population of stem cells, which accumulate mutations when a stem cell undergoes cell division to produce another daughter stem cell.

However, there are at least two factors that could induce mutations into stem cells. One is mutations that arise during the division and differentiation of stem cells, and the other is mutations that are induced by the micro-environment of the tissue (94). These two factors can be incorporated in our derivation (equations 1-5) by replacing by  $\mu$  and  $\mu'$ , where  $\mu'$  is defined as the total mutation rate including these two factors. These two factors well explain the observed exponential increase of SNVs after 80 yr. in brain (75). They also explain the recently reported almost star-shaped tree of hematopoietic stem cells (38). The tree indicates that the hematopoietic stem cell population grows rapidly and reaches a plateau, and since then they accumulate mutations by producing additional progenitor cells.

In conclusion, the Muller's ratchet principle provides a rational foundation to study the origin, maintenance or augmentation of vulnerability, frailty, morbidity and mortality associated with aging as well as many inherited and latent disorders. The principle focuses on generally predictable effects of mutation accumulation on the aging phenotypes and compliments two well-known mechanisms of aging – the Hayflick limit and mutation rate (91, 95). This trend is also reflected at the genomic level in hematopoietic cells (38). Note that mutation rates, telomere shortening and the Hayflick process represent, respectively, mutational, molecular, and cellular clocks. Similarly, aggregate methylation status shows a linear relationship with age, also called, DNA methylation (epigenetic) clock (8). Mutational, molecular, cellular and epigenetic clocks are largely invariant and species specific “clock-like” processes among healthy organs and individuals (96). Similarly, at the organism level, gestation period, childhood, puberty, ovulation and menopause are predictable traits. Note that puberty, menopause and life span are evolutionarily conserved landmarks in human life history (97). It is not surprising that methylation, which links the G-P spaces has been shown to predict biological aging and longevity (8, 32). From a G-E-P map perspective, these are suggestive of the predictability that exists among levels of biological diversity (16). On the other hand, epigenetic drift caused by stochastic changes in methylation in aging cell populations (36) may reflect the underlying genetic drift of those populations due to mutation accumulation. Epigenetic drift could cause departures from this norm, however, by many orders of magnitude, among tissues, organs and stress (8, 74, 98) and disease conditions. . Therefore, in principle,

there may be a predicable relationship between the pace of “clicks” and the “ticks” of Muller’s ratchet and epigenetic clocks. Deceleration or acceleration of these regular events could serve as indices of health, morbidity and senescence.

How might this information be used in a clinical setting? It has become a routine practice to classify mutations into finite number of classes such as pathogenic, benign, uncertain and actionable. Instead, in some cases, and in accordance with the Haldane-Muller principle, cumulative effect of the entire spectrum of mutations may have to be considered in relation to demographic and developmental aspects of cell populations/tissue, for developing tissue level interventions within organs. Accordingly, guidelines already developed for clinical diagnostic purposes based solely on the effect of individual mutations, needs to be reevaluated. Here aging and cancer related vulnerabilities would share both similarities and differences (99). Perhaps, suppression or elimination of the effects of the entire spectrum of mutations by novel means might be helpful toward ameliorating overall health (100). Further, detailed investigations into the origins, distribution and effects of somatic mutations could open up the possibility for describing many medically unexplained symptoms and even new disorders on the basis of novel mutations and the degree of mutation load. These might also require developing novel clinical trials in order to manage medically undiagnosed symptoms at those levels of diversity. In other words, the scope of N-of-One clinical trials (101) could be extended to include interventions at any level of biological hierarchies within an individual. For instance, from the perspective of precision medicine, it holds promise in order to effectively identify individuals at higher risk of developing singular or multiple morbidities (102) and for devising new preventive measures such as tissue and organ specific synolytics (3, 103). Clearly, some concepts of evolutionary genetics have the potential to illuminate enduring questions in human health and longevity.

**ACKNOWLEDGEMENTS:** We dedicate this paper to Richard Lewontin and Tomoko Ohta and for their prescient ideas on units of selection and mutational effects, respectively. DRG thanks Peter Ellison, Nir Barzilai, Jan Vijg for support, and Dr. Sri Raj for suggestions.

## References

1. Garrod A (1931) *The inborn factors in disease: an essay* (The Clarendon Press).
2. Pearl R (1976) *The Biology of Death* (Arno Publishers, New York).
3. Kirkland JL, Tchkonja T (2017) Cellular Senescence: A Translational Perspective. *EBioMedicine* 21:21–28.
4. Finch C (1990) *Longevity, senescence, and the genome* (University of Chicago Press, Chicago).
5. Vijg J (2007) *Aging of the Genome: the dual role of the DNA in life and death* (Springer, New York).
6. Govindaraju D (2015) Evolutionary genetic basis of longevity and senescence. *Longevity Genes* (Springer, New York), pp 1–44.
7. Allison B (2008) Divergence of mechanistic pathways mediating aging and developmental programming of cardiovascular diseases. *FASEB J* 30:1968–1975.
8. Field AE, et al. (2018) DNA Methylation Clocks in Aging: Categories, Causes, and Consequences. *Molecular Cell* 71(6):882–895.
9. Wagner G P (1996) Homologues, Natural Kinds and the Evolution of Modularity. *Integr Comp Bio*:36–43.
10. Klingenberg CP (2008) Morphological Integration and Developmental Modularity. *Annual Review of Ecology, Evolution, and Systematics*:115–132.
11. Ori A, et al. (2015) Integrated Transcriptome and Proteome Analyses Reveal Organ-Specific Proteome Deterioration in Old Rats. *Cell Systems* 1(3):224–237.
12. Horvath S, Raj K (2018) DNA methylation-based biomarkers and the epigenetic clock theory of ageing. *Nat Rev Genet* 19(6):371–384.
13. Moore KL, Persaud TVN, Torchia MG (2011) *The Developing Human: Clinically Oriented Embryology with Student Consult Online Access, 9th Edition* (Saunders, Philadelphia, PA). 9th edition.
14. Buss LW (1988) *The Evolution of Individuality* (Princeton University Press, Princeton, N.J.). 1st Ed edition.
15. Nusslein-Volhard C (2006) *Coming to Life: How Genes Drive Development* (Kales Press).
16. Lewontin RC (1970) The Units of Selection. *Annual Review of Ecology and Systematics* 1(1):1–18.
17. Lewontin RC (1974) *The Genetic Basis of Evolutionary Change* (Columbia Univ Pr, New York). 1st US-1st Printing edition.
18. Houle D, Govindaraju DR, Omholt S (2010) Phenomics: the next challenge. *Nature Reviews Genetics* 11(12):855–866.
19. Molina DK, DiMaio VJM (2015) Normal Organ Weights in Women: Part I-The Heart. *Am J Forensic Med Pathol* 36(3):176–181.
20. Harmse WS (2011) Normal variance in renal size in relation to body habitus. *SA Journal of Radiology* 15(4). Available at: <https://www.ajol.info/index.php/sajr/article/view/73478> [Accessed September 17, 2018].

- 584 21. Farr JN, et al. (2017) Targeting cellular senescence prevents age-related bone loss in mice. *Nature Medicine*  
585 23(9):1072–1079.
- 586 22. Rockwood K, Bergman H (2012) FRAILITY: A Report from the 3rd Joint Workshop of IAGG/WHO/SFSGG,  
587 Athens, January 2012. *Can Geriatr J* 15(2):31–36.
- 588 23. Deursen JM van (2014) The role of senescent cells in ageing. *Nature* 509(7501):439–446.
- 589 24. Villacampa-Fernández P, Navarro-Pardo E, Tarín JJ, Cano A (2017) Frailty and multimorbidity: Two related yet  
590 different concepts. *Maturitas* 95:31–35.
- 591 25. Muñoz-Espín D, Serrano M (2014) Cellular senescence: from physiology to pathology. *Nature Reviews*  
592 *Molecular Cell Biology* 15(7):482–496.
- 593 26. Cesari M, Vellas B, Gambassi G (2013) The stress of aging. *Experimental Gerontology* 48(4):451–456.
- 594 27. LeBrasseur NK, Tchkonja T, Kirkland JL (2015) Cellular Senescence and the Biology of Aging, Disease, and  
595 Frailty. *Frailty: Pathophysiology, Phenotype and Patient Care* 83:11–18.
- 596 28. Medawar PB (1952) *An unsolved problem of biology* (Published for the College by H.K. Lewis).
- 597 29. Szilard L (1959) On the nature of the aging process. *Proc Natl Acad Sci U S A* 45(1):30–45.
- 598 30. Muller HJ (1950) Our load of mutations. *Am J Hum Genet* 2(2):111–176.
- 599 31. Crow JF (1970) Genetic Loads and the Cost of Natural Selection. *Mathematical Topics in Population Genetics*  
600 (Springer-Verlag, New York), pp 128–177.
- 601 32. Horvath S (2013) DNA methylation age of human tissues and cell types. *Genome Biology* 14(10):3156.
- 602 33. Lynch M (2016) Mutation and Human Exceptionalism: Our Future Genetic Load. *Genetics* 202(3):869–875.
- 603 34. Ohta T (1998) Evolution by nearly-neutral mutations. *Mutation and Evolution, Contemporary Issues in*  
604 *Genetics and Evolution.*, eds Woodruff RC, Thompson JN (Springer Netherlands, Dordrecht), pp 83–90.
- 605 35. Kondrashov AS (1994) Muller's ratchet under epistatic selection. *Genetics* 136(4):1469–1473.
- 606 36. Veitia RA, Govindaraju DR, Bottani S, Birchler JA (2017) Aging: Somatic Mutations, Epigenetic Drift and Gene  
607 Dosage Imbalance. *Trends in Cell Biology* 27(4):299–310.
- 608 37. Rattan SIS (2018) Biogerontology: research status, challenges and opportunities. *1* 89(2):291–301.
- 609 38. Lee-Six H, et al. (2018) Population dynamics of normal human blood inferred from somatic mutations.  
610 *Nature*:1.
- 611 39. Bianconi E, et al. (2013) An estimation of the number of cells in the human body. *Ann Hum Biol* 40(6):463–  
612 471.
- 613 40. Ohta T (1973) Slightly Deleterious Mutant Substitutions in Evolution. *Nature* 246(5428):96–98.
- 614 41. Simmons MJ, Crow JF (1977) Mutations Affecting Fitness in Drosophila Populations. *Annual Review of*  
615 *Genetics* 11(1):49–78.

- 616 42. Rindi G, et al. (2018) A common classification framework for neuroendocrine neoplasms: an International  
617 Agency for Research on Cancer (IARC) and World Health Organization (WHO) expert consensus proposal.  
618 *Modern Pathology*:1.
- 619 43. Crow JF (2000) The origins, patterns and implications of human spontaneous mutation. *Nature Reviews*  
620 *Genetics* 1(1):40–47.
- 621 44. Charlesworth B (2012) The Effects of Deleterious Mutations on Evolution at Linked Sites. *Genetics* 190(1):5–  
622 22.
- 623 45. Lynch M, Bürger R, Butcher D, Gabriel W (1993) The Mutational Meltdown in Asexual Populations. *J Hered*  
624 84(5):339–344.
- 625 46. Vassilieva LL, Hook AM, Lynch M (2000) The Fitness Effects of Spontaneous Mutations in *Caenorhabditis*  
626 *Elegans*. *Evolution* 54(4):1234–1246.
- 627 47. Rodier F, Campisi J (2011) Four faces of cellular senescence. *The Journal of Cell Biology*:jcb.201009094.
- 628 48. Gowrishankar S, et al. (2015) Massive accumulation of luminal protease-deficient axonal lysosomes at  
629 Alzheimer's disease amyloid plaques. *PNAS* 112(28):E3699–E3708.
- 630 49. Clegg A, Young J, Iliffe S, Rikkert MO, Rockwood K (2013) Frailty in elderly people. *The Lancet* 381(9868):752–  
631 762.
- 632 50. Cannon WB (1963) *The Wisdom Of The Body* (W. W. Norton & Company, New York). Rev. and Enl. Ed edition.
- 633 51. Lerner IM (1954) *Genetiv Homeostasis* (Oliver and Boyd, Edinburgh).
- 634 52. Hughes AL (2008) Near Neutrality. *Annals of the New York Academy of Sciences* 1133(1):162–179.
- 635 53. Lang P-O, Michel J-P, Zekry D (2009) Frailty Syndrome: A Transitional State in a Dynamic Process. *GER*  
636 55(5):539–549.
- 637 54. Walston J, et al. Integrating Frailty Research into the Medical Specialties—Report from a U13 Conference.  
638 *Journal of the American Geriatrics Society* 65(10):2134–2139.
- 639 55. Jaenisch R, Young R (2008) Stem Cells, the Molecular Circuitry of Pluripotency and Nuclear Reprogramming.  
640 *Cell* 132(4):567–582.
- 641 56. Brenner S (2010) Sequences and consequences. *Philosophical Transactions of the Royal Society B: Biological*  
642 *Sciences* 365(1537):207–212.
- 643 57. Hayflick L, Moorhead PS (1961) The serial cultivation of human diploid cell strains. *Experimental Cell*  
644 *Research* 25(3):585–621.
- 645 58. Medvedev ZA (1990) An attempt at a rational classification of theories of ageing. *Biol Rev Camb Philos Soc*  
646 65(3):375–398.
- 647 59. Celiker H, Gore J (2013) Cellular cooperation: insights from microbes. *Trends in Cell Biology* 23(1):9–15.
- 648 60. Wang J, Egnot B, Paluh J (2016) Cell Competition and Cooperation in Tissue Development. *Journal of Tissue*  
649 *Science & Engineering* 7(2):1–3.

650 61. Crow J F (1993) Mutation, mean fitness, and genetic load. 9:3–42.

651 62. Haubold K, et al. (2003) Acute effects of desmin mutations on cytoskeletal and cellular integrity in cardiac  
 652 myocytes. *Cell Motility* 54(2):105–121.

653 63. Haldane JBS (1937) The Effect of Variation of Fitness. *The American Naturalist* 71(735):337–349.

654 64. Metzger JJ, Eule S (2013) Distribution of the Fittest Individuals and the Rate of Muller's Ratchet in a Model  
 655 with Overlapping Generations. *PLOS Computational Biology* 9(11):e1003303.

656 65. Walston J, et al. (2017) Integrating Frailty Research into the Medical Specialties—Report from a U13  
 657 Conference. *Journal of the American Geriatrics Society* 65(10):2134–2139.

658 66. mitnitsky AS Thee rate of aging: the rate of deficit acculation does not change over adult life span.  
 659 *Biogerontology*.

660 67. Buchman TG (2002) The community of the self. *Nature*. doi:10.1038/nature01260.

661 68. Shirts BH, et al. (2018) Using Somatic Mutations from Tumors to Classify Variants in Mismatch Repair Genes.  
 662 *Am J Hum Genet* 103(1):19–29.

663 69. Neiman M, Hehman G, Miller JT, Logsdon JM, Taylor DR (2010) Accelerated Mutation Accumulation in  
 664 Asexual Lineages of a Freshwater Snail. *Mol Biol Evol* 27(4):954–963.

665 70. Jones MJ, et al. (2013) Distinct DNA methylation patterns of cognitive impairment and trisomy 21 in down  
 666 syndrome. *BMC Medical Genomics* 6(1):58.

667 71. Behjati S, et al. (2014) Genome sequencing of normal cells reveals developmental lineages and mutational  
 668 processes. *Nature* 513(7518):422–425.

669 72. Screening for muscle wasting and dysfunction in patients with chronic kidney disease - Kidney International  
 670 Available at: [https://www.kidneyinternational-online.org/article/S0085-2538\(16\)30003-5/abstract](https://www.kidneyinternational-online.org/article/S0085-2538(16)30003-5/abstract) [Accessed  
 671 June 29, 2018].

672 73. Klein BEK, Klein R, Knudtson MD, Lee KE (2005) Frailty, morbidity and survival. *Archives of Gerontology and*  
 673 *Geriatrics* 41(2):141–149.

674 74. Bae T, et al. (2017) Different mutational rates and mechanisms in human cells at pregastrulation and  
 675 neurogenesis. *Science*:eaan8690.

676 75. Lodato MA, et al. (2018) Aging and neurodegeneration are associated with increased mutations in single  
 677 human neurons. *Science* 359(6375):555–559.

678 76. Visvader JE (2011) Cells of origin in cancer. *Nature* 469(7330):314–322.

679 77. Fisher RA (1941) Average Excess and Average Effect of a Gene Substitution. *Annals of Eugenics* 11(1):53–63.

680 78. Crow JF (1986) Basic concepts in population, quantitative, and evolutionary genetics. *Basic concepts in*  
 681 *population, quantitative, and evolutionary genetics*. Available at:  
 682 <https://www.cabdirect.org/cabdirect/abstract/19880165065> [Accessed September 17, 2018].

683 79. Templeton AR (2006) *Population Genetics and Microevolutionary Theory* (John Wiley & Sons).



- 684 80. Hartl DL, Clark AG (2006) *Principles of Population Genetics* (Sinauer Associates is an imprint of Oxford  
685 University Press, Sunderland, Mass). 4th edition.
- 686 81. Engels EA, et al. (2007) Systematic Evaluation of Genetic Variants in the Inflammation Pathway and Risk of  
687 Lung Cancer. *Cancer Res* 67(13):6520–6527.
- 688 82. O'Huallachain M, Karczewski KJ, Weissman SM, Urban AE, Snyder MP (2012) Extensive genetic variation in  
689 somatic human tissues. *PNAS* 109(44):18018–18023.
- 690 83. Kraemer SA, Böndel KB, Ness RW, Keightley PD, Colegrave N (2017) Fitness change in relation to mutation  
691 number in spontaneous mutation accumulation lines of *Chlamydomonas reinhardtii*. *Evolution* 71(12):2918–  
692 2929.
- 693 84. Morelli KH, et al. (2017) Severity of Demyelinating and Axonal Neuropathy Mouse Models Is Modified by  
694 Genes Affecting Structure and Function of Peripheral Nodes. *Cell Reports* 18(13):3178–3191.
- 695 85. Buja A, et al. (2017) Damaging Mutations are Associated with Diminished Motor Skills and IQ in Children on  
696 the Autism Spectrum. *bioRxiv*:141200.
- 697 86. Jamuar SS, et al. (2014) Somatic Mutations in Cerebral Cortical Malformations. *New England Journal of*  
698 *Medicine* 371(8):733–743.
- 699 87. Lee JH (2016) Somatic mutations in disorders with disrupted brain connectivity. *Experimental & Molecular*  
700 *Medicine* 48(6):e239.
- 701 88. Jamuar SS, et al. (2014) Somatic Mutations in Cerebral Cortical Malformations. *New England Journal of*  
702 *Medicine* 371(8):733–743.
- 703 89. Deciphering Developmental Disorders Study, et al. (2017) Prevalence and architecture of de novo mutations  
704 in developmental disorders. *Nature* 542:433.
- 705 90. Risques RA, Kennedy SR (2018) Aging and the rise of somatic cancer-associated mutations in normal tissues.  
706 *PLOS Genetics* 14(1):e1007108.
- 707 91. Lynch M (2010) Evolution of the mutation rate. *Trends in Genetics* 26(8):345–352.
- 708 92. Engelman M, Seplaki CL, Varadhan R (2017) A Quiescent Phase in Human Mortality? Exploring the Ages of  
709 Least Vulnerability. *Demography* 54(3):1097–1118.
- 710 93. Levitis DA (2010) Before senescence: the evolutionary demography of ontogenesis. *Proceedings of the Royal*  
711 *Society of London B: Biological Sciences*:rsob20102190.
- 712 94. Barthes J, et al. (2014) Cell Microenvironment Engineering and Monitoring for Tissue Engineering and  
713 Regenerative Medicine: The Recent Advances. *BioMed Research International*. doi:10.1155/2014/921905.
- 714 95. Hayflick L, Moorhead PS (1961) The serial cultivation of human diploid cell strains. *Experimental Cell*  
715 *Research* 25(3):585–621.
- 716 96. Alexandrov LB, et al. (2015) Clock-like mutational processes in human somatic cells. *Nature Genetics*  
717 47(12):1402–1407.
- 718 97. Levine ME, et al. (2016) Menopause accelerates biological aging. *PNAS* 113(33):9327–9332.



98. Hodgkinson A, Eyre-Walker A (2011) Variation in the mutation rate across mammalian genomes. *Nature Reviews Genetics* 12(11):756–766.
99. Aunan JR, Cho WC, Søreide K (2017) The Biology of Aging and Cancer: A Brief Overview of Shared and Divergent Molecular Hallmarks. *Aging Dis* 8(5):628–642.
100. Crow JF (1957) Possible consequences of an increased mutation rate. *Eugenics Quarterly* 4(2):67–80.
101. Mirza RD, Punja S, Vohra S, Guyatt G (2017) The history and development of N-of-1 trials. *J R Soc Med* 110(8):330–340.
102. Winblad B, et al. (2016) Defeating Alzheimer's disease and other dementias: a priority for European science and society. *The Lancet Neurology* 15(5):455–532.
103. Lehmann M, et al. (2017) Senolytic drugs target alveolar epithelial cell function and attenuate experimental lung fibrosis ex vivo. *Eur Respir J* 50(2). doi:10.1183/13993003.02367-2016.
104. Jaiswal S, et al. (2014) Age-Related Clonal Hematopoiesis Associated with Adverse Outcomes. *New England Journal of Medicine* 371(26):2488–2498.
105. MacNee W, Rabinovich RA, Choudhury G (2014) Ageing and the border between health and disease. *European Respiratory Journal*:erj01340-2014.
106. Winblad B, et al. (2016) Defeating Alzheimer's disease and other dementias: a priority for European science and society. *The Lancet Neurology* 15(5):455–532.
107. Sauver JLS, et al. (2015) Risk of developing multimorbidity across all ages in an historical cohort study: differences by sex and ethnicity. *BMJ Open* 5(2):e006413.
108. Mitnitsky A, Rockwood K (2015) The rate of aging: the rate of deficit accumulation does not change over the adult life span. *Biogerontology* xxx:xx–xx.
109. MYC, Cell Competition, and Cell Death in Cancer: The Inseparable Triad Available at: <https://www.ncbi.nlm.nih.gov/pmc/articles/PMC5406867/> [Accessed June 6, 2018].
110. Di Gregorio A, Bowling S, Rodriguez TA (2016) Cell Competition and Its Role in the Regulation of Cell Fitness from Development to Cancer. *Developmental Cell* 38(6):621–634.

## List of figures

### Figures

### page

Figure 1 A simplified view of organogenesis 27

Figure 2 General features of mutation accumulation as ratchet 28

Figure 3 Mutation accumulation in cell populations as a Moran process 29

Figure 4 Temporal trends in mutation accumulation 30

Supplementary information 31

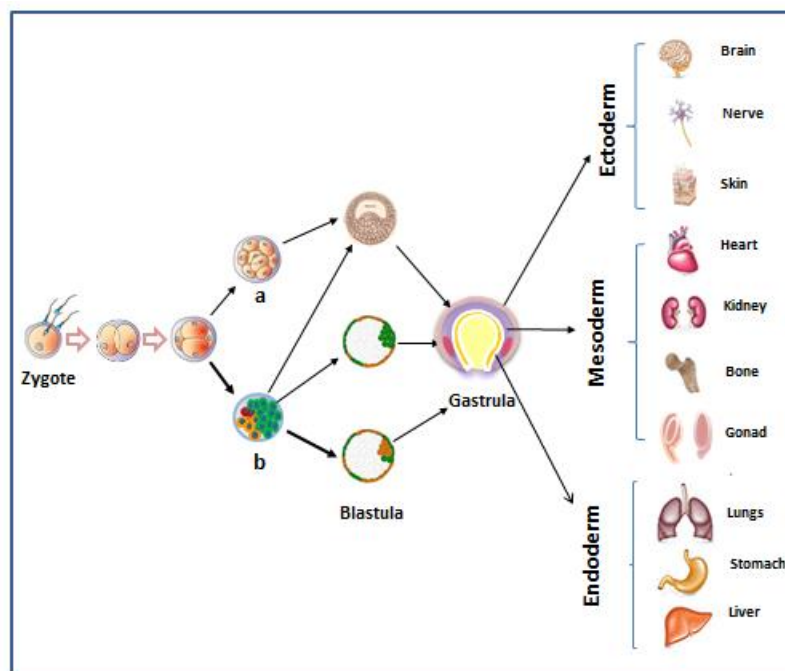

**Figure 1:** A simplified view of organogenesis. Zygotes with normal (a) cells and mutant cells (b). These could produce organs with normal tissues or mosaics (sectorial). Although various tissues are quasi-independent, they are connected by blood vessels and nerves. They possess modular and allometric properties (10), as well as show normal distribution, and behave as quantitative traits. It is assumed that sperm and egg cells carry a few ancestral mutations, and recruitments or abatement of cells follow demographic principles (see the text).

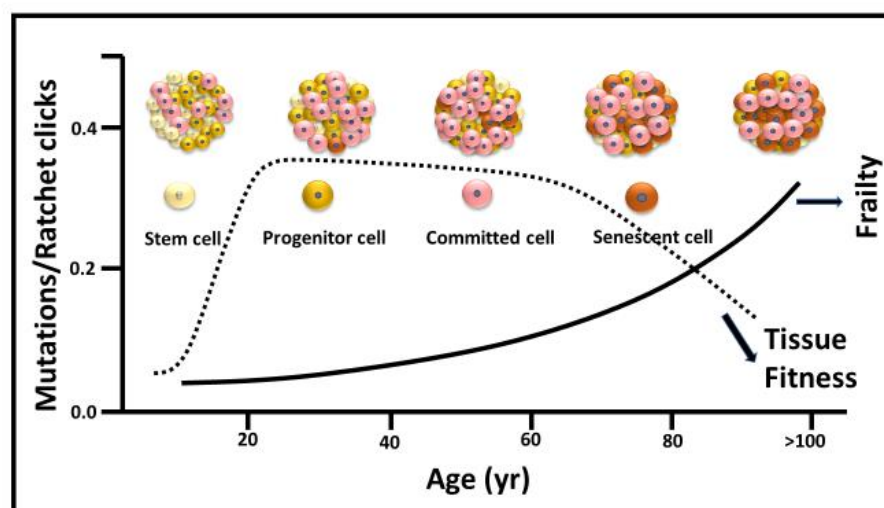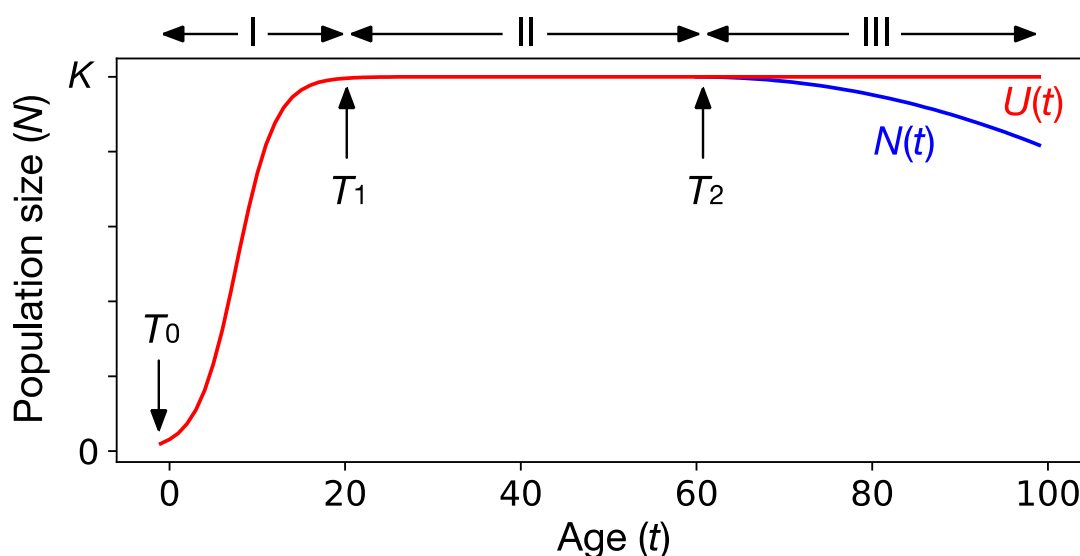

Figure 2 **A:** Some general features of mutation accumulation as ratchet, cellular senescence and frailty among somatic tissues in relation to age: hematopoietic cells (104), incidence of cancer, multimorbidity caused by cardiovascular, cognitive, respiratory disorders (105–107), multimorbidity and the frailty index (108). Cellular diversity within tissues modified from Horvath 2018. **Muller's ratchet clicks more with age. Also, the fitness of cell populations is rank-ordered and the average excess of deleterious mutational effects (Crow 1986) are greater in a given tissue with advanced age, which is equated with frailty.** **B:** Our model of the cell population size, which introduces  $U$ , the upper limit of the population size (red line).  $K$  is the adult population size, so that the population size (red line) increases up to  $K$  in Phase I ( $t < T_1 \approx 20$  yr). Then, in the adult phase (Phase II), the population size is stable at  $K$ . When the aging process proceeds and it becomes difficult to maintain the population size at  $K$ , the population size decreases in Phase III (blue line), thereby accelerating the aging process.

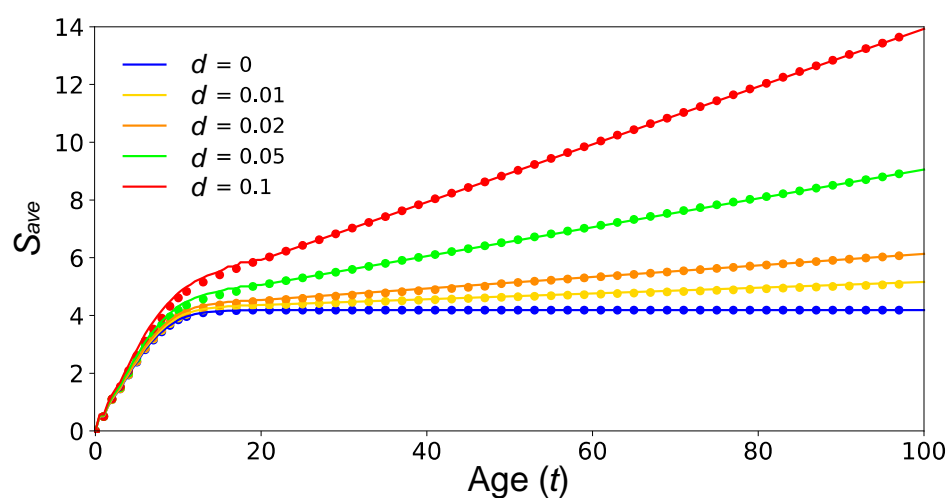

Figure 3 --- The number of accumulated mutations per cell,  $S_{total}/n = S_{ave}$  (y-axis) as a function of T, age. Theoretical prediction from equations (1-5) is shown by solid lines and simulation results are shown by closed circles. A logistic growth of the population size up to  $K=100$  with the initial growth rate  $r=0.5$  is assumed (See equation (S1) in Supplementary Information). We assumed  $b=0.5$ , and five values of  $d$  were considered ( $d=0, 0.01, 0.02, 0.05, 0.1$ ).

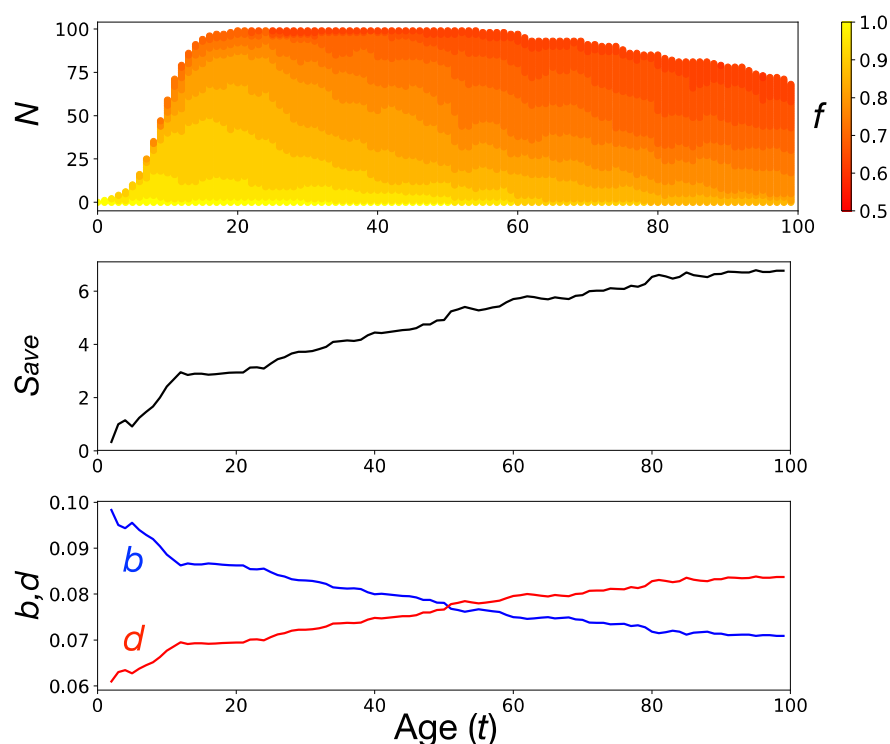

**Figure 4:** A typical simulation run.  $d_0=0.06$  is assumed as the initial condition. As  $B(t)$  decreases and  $D(t)$  increases (bottom panel) with accumulating mutations (middle), and they became nearly identical when cells accumulated roughly seven mutations around  $T=50$ . From this time point, the population size can start shrinking. Along the run, cells degrade with decreasing functionality ( $f$ ), from yellow to red in the top panel

## Supplementary information

**Assumptions and Parameters:** Our model takes a demographic approach to aging process starting from a single stem cell through the development of a mature tissue, and its reduced loss of physiological functions over time, and eventual death. We model the aging process such that it is assumed that a cell should be specified by three parameters, the rate of cell division, functionality or healthiness and death rate (respectively, denoted by  $b$ ,  $f$ , and  $d$ ), which are given by a function of the mutations that the cell has accumulated.

Let  $b_0$ ,  $d_0$  and  $f_0$  be these parameters at birth. Then, these parameters for an individual cell with  $k$  mutations are given as follows. Assuming that mutations make the cell unhealthy,  $f$  is given by

$$f = f_0 (1 - \delta f_1)(1 - \delta f_2)(1 - \delta f_3) \dots (1 - \delta f_k).$$

where  $\delta f_i$  is the relative reduction in the functionality caused by the  $i$ th mutation. Similar forms should be applied to the cell division and death rates. As we assume mutations cause a decrease of the birth rate and an increase of the death rate, we have

$$b = b_0 (1 - \delta b_1)(1 - \delta b_2)(1 - \delta b_3) \dots (1 - \delta b_k).$$

$$d = d_0 (1 + \delta d_1)(1 + \delta d_2)(1 + \delta d_3) \dots (1 + \delta d_k).$$

These equations mean that a single mutation is specified with its effects on the three parameters.

We here assume that mutations occur during cell division, that is, a cell lineage splits into two, and they accumulate mutations due to replication errors and random factors at rates  $\alpha\mu$  and  $(1 - \alpha)\mu$ . To be simple, two types of mutation could be involved, lethal and deleterious, and the proportion of lethal mutations is denoted by  $\beta$ . The former is an extremely damaging mutation, with which the cell will die and eliminated by inter-cellular competition (109) or apoptosis. The latter is a deleterious (or neutral) mutation that affects the cell viability ( $\sim$  cellular fitness) only partially (110), so that the cell becomes slightly less fit relative to its neighboring cells. The accumulation of deleterious mutations also causes a cell death in two ways. One is a random death according to its death rate ( $d$ ), and the other is a forced death. The latter occurs when

the cell has accumulated too many mutations so that the parameter of healthiness ( $f$ ) becomes lower than a threshold value ( $Lf$ ).  $F(t)$ ,  $B(t)$  and  $D(t)$  are the sums of  $f$ ,  $b$  and  $d$ , respectively, over all cells in the population at time  $t$ . Under this setting, we model the aging process of a tissue along the accumulation of deleterious mutations in the cell population as detailed in the next section.

**Modeling a cell population:** Our modeling is based on the Moran model, which assumes that an individual cell dies and then the empty slot is filled by a new cell. In other words, death and birth events are equal, so that the population size is kept constant. Cell death occurs at a constant interval. In this work, in order to incorporate the changes of population size, we add two modifications to the Moran model. First, cell death occurs randomly at any time point, depending on the death rate of each cell (not in a constant time interval). A dead cell may (or may not) be replaced by a daughter cell of one of the cells in the population, and the parental cell is randomly chosen according to its relative contribution to the population birth rate,  $B(t)$ . Second, in addition to cell death, our model creates empty slots when  $U(t)$  increases. When an empty slot arises at time  $t$ , it is assumed that the slot is immediately filled (as the Moran model does) when the population has sufficient reproductive ability, that is,  $B(t)/D(t) > 1$ , otherwise the probability of successful reproduction is given by  $B(t)/D(t)$ . For simulating the aging process, the system starts with  $B(t)$  much higher than  $D(t)$ , such that empty slots are immediately filled in Phases I and II. In our setting,  $B(t)$  and  $D(t)$  monotonically increases and decreases as the process proceeds, so that  $T_2$  is considered as the time when  $B(t)$  first becomes lower than  $D(t)$ , (i.e.,  $B(T_2) \sim D(T_2)$ ). Thus, we cannot explicitly specify when the phase shifts from II to III. Rather, Phases II and III are defined such that phase III starts when  $N(t)$  starts declining. Therefore,  $T_2$  could differ among independent realizations with the identical parameter set. In Phase III, as a new cell can arise only when a cell dies in Phase III (as well as Phase II), once a slot is not successfully filled, it remains empty for the rest of the process, thereby resulting in an irreversible decrease of the population size (e.g., osteoporosis, sarcopenia, neurodegeneration in Alzheimer's diseases). The process is terminated when the cell population (tissue) reaches



functional attenuation due to dysregulation of physiological processes (melts down sensu (45)  
 Lynch et. al 1993), that is,  $F(t)$  first hits a threshold value,  $LF$ .

assume a logistic function for  $U(t)$ :

$$U(t) = \frac{Ke^{r(t+1)}}{K+e^{r(t+1)}-1} = \frac{K}{1+(K-1)e^{-r(t+1)}}, \quad (S1)$$

where  $r$  is the initial growth rate (cell division rate per year) and  $K$  is carrying capacity that  
 roughly represents the population size of the adult tissue. We will later discuss the effect of this  
 arbitrary choice of logistic function. In phase II,  $U(t) = N(t) = K$ , while in Phase III,  $U(t) = K$  and  
 $N(t) < K$ .
